# Supplementary material for: A diagnostic model for discrimination between Pneumocystis jirovecii pneumonia and asymptomatic colonization based on multiple parameters
Source: Research Square preprint supplement (doi:10.21203/rs.3.rs-8251095/v1), 2025-12-22
Supplement: Supplementary file 1 [file 1ccaffe2765967497e3cc251.pdf]

# Figures

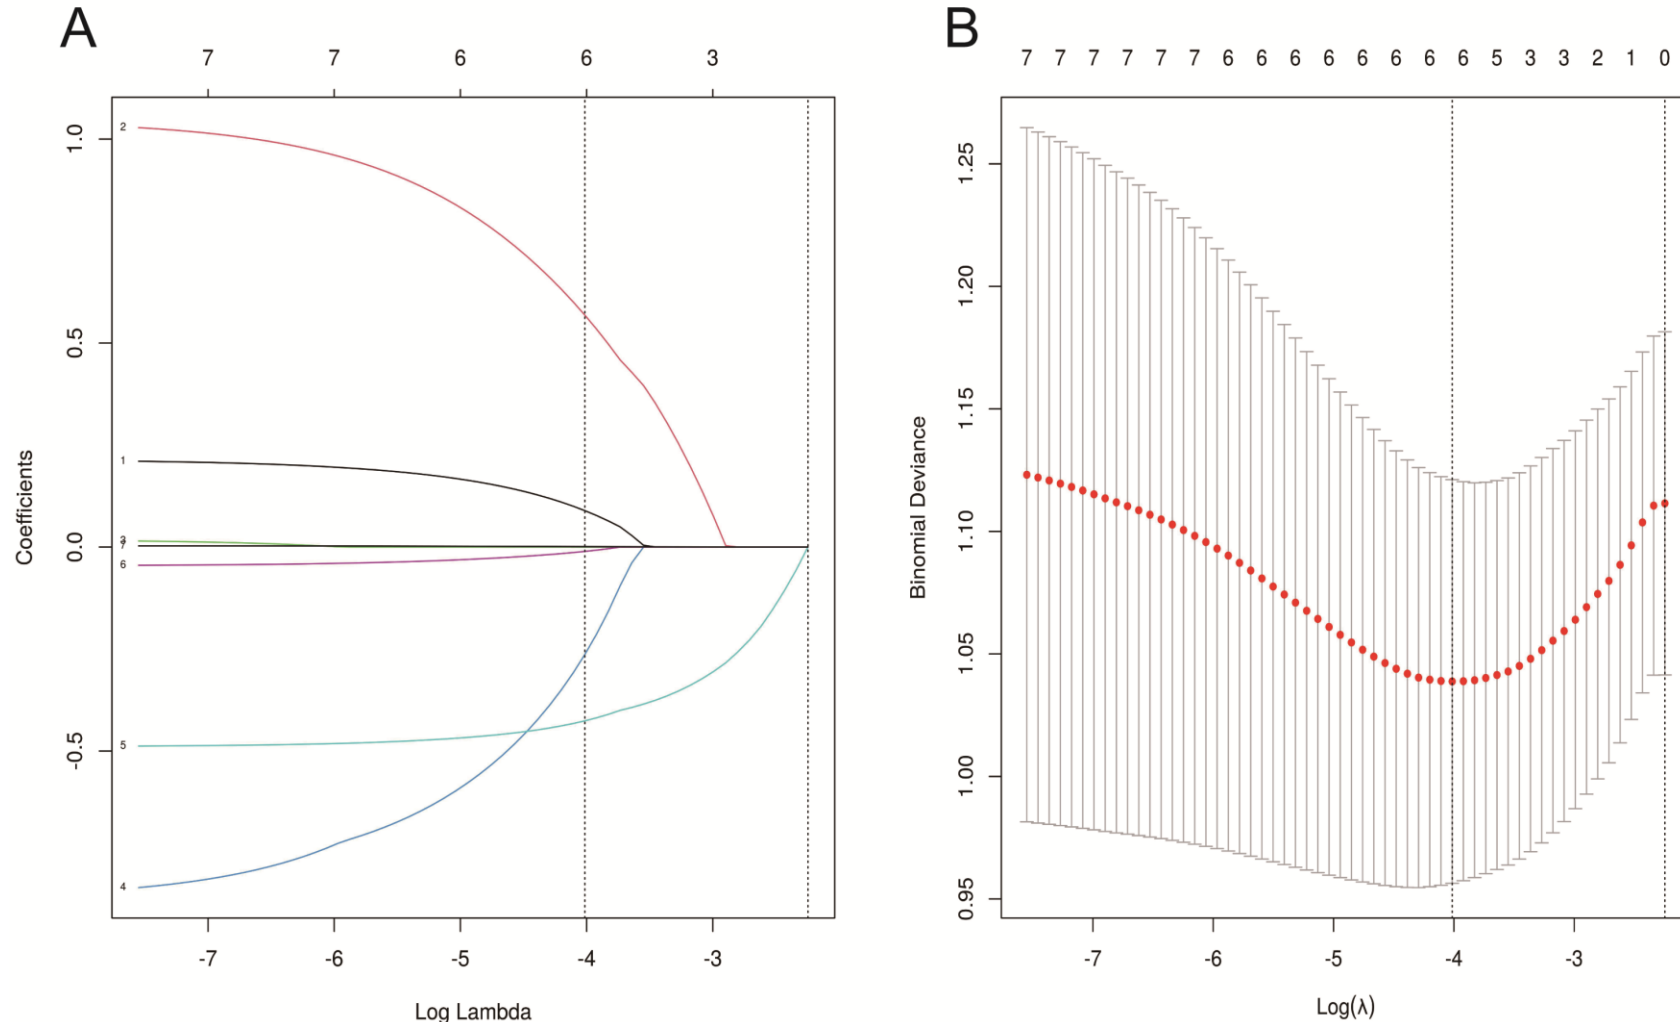

FigureS1. Predictors for machine learning models were selected by the least absolute shrinkage and selection operator (LASSO) algorithm and clinical experience. (A) By LASSO algorithm, the coefficients of seven predictors including RBC, Neu%, PCT, LDH, Shortness of breath and Chest tightness, (B) By LASSO algorithm, the binomial deviance of seven predictors.

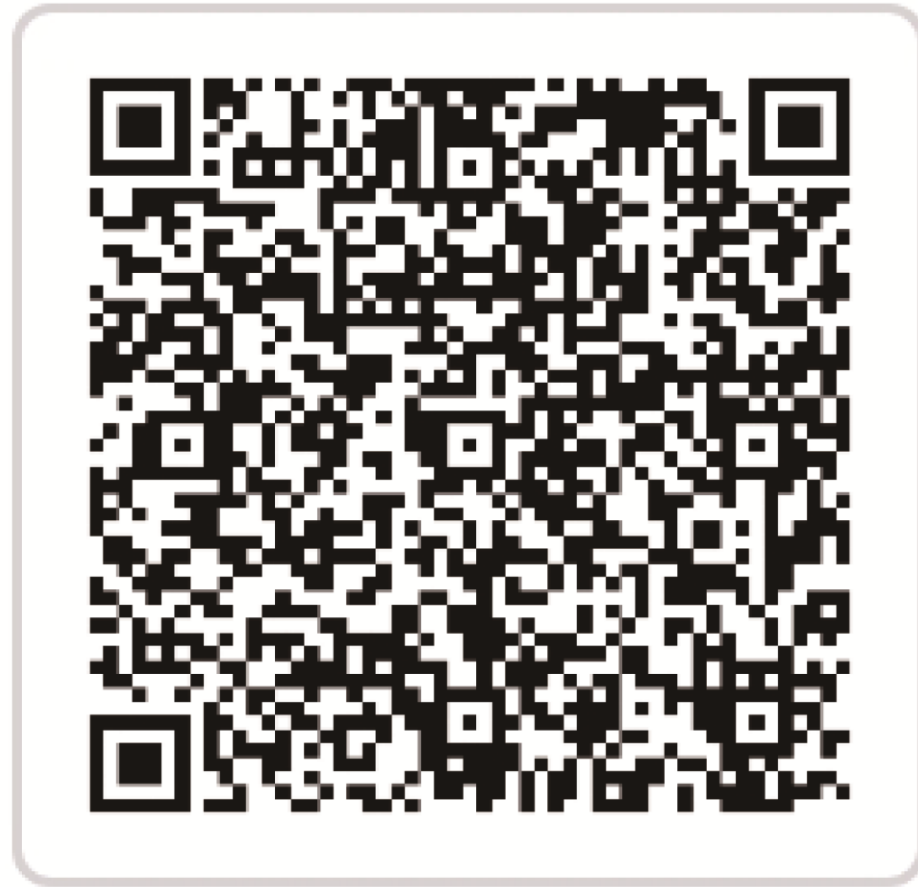

FigureS2. the QR code link of the model for easy access to it. This is to facilitate the usage of the PJ infection vs colonization model.
